# Supplementary material for: High strain in (K0.40Na0.60)(Nb0.955Sb0.045)O3–Bi0.50Na0.50ZrO3lead-free ceramics with large piezoelectricity
Source: Royal Society of Chemistry journal article supplement (doi:10.1039/c4tc01533a), 2014-09-22
Supplement: c4tc01533a1.pdf [file c4tc01533a1.pdf]

# Journal of Materials Chemistry C

## Supporting Information

### High Strain in $(\text{K}_{0.40}\text{Na}_{0.60})(\text{Nb}_{0.955}\text{Sb}_{0.045})\text{O}_3\text{-Bi}_{0.50}\text{Na}_{0.50}\text{ZrO}_3$ Lead-free Ceramics with Large Piezoelectricity

*Ting Zheng, Jiagang Wu<sup>a)</sup>, Xiaojing Cheng, Xiaopeng Wang, Binyu Zhang, Dingquan Xiao, and Jianguo Zhu*

*Department of Materials Science, Sichuan University, Chengdu 610064, P.R.China*

*Xiangjian Wang and Xiaojie Lou*

*Multi-disciplinary Materials Research Center, Frontier Institute of Science and Technology, Xi'an Jiaotong University, Xi'an 710054, P. R. China*

---

a) Corresponding author: Email: [msewujg@scu.edu.cn](mailto:msewujg@scu.edu.cn) and [wujiagang0208@163.com](mailto:wujiagang0208@163.com)

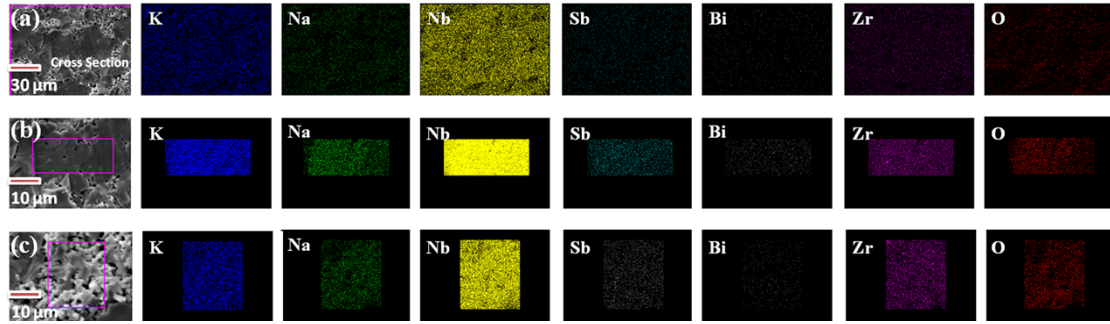

**Figure S1:** Element mapping of (a) cross section as well as (b) large and (c) small grains of the ceramics with  $x=0.04$ .

In this work, we measured the element mapping of cross section as well as small and large grains by the field emission-scanning electron microscopy (FE-SEM) with an energy-dispersive X-ray spectroscopy (JSM-7500, Japan), as shown in Figure S1. All the elements are well distributed to the ceramic matrix.

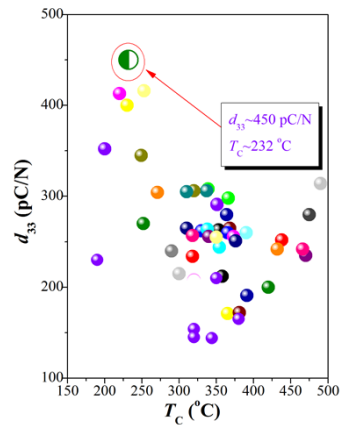

**Figure S2:** Comparison analysis of  $d_{33}$  vs.  $T_C$  of KNN-based materials.

Figure S2 gives the  $d_{33}$  and  $T_C$  of the KNN-based ceramics derived from the references. According to Figure S2, the  $d_{33}$  of this work is higher than other reported results of KNN-based ceramics.
